# Supplementary material
Source: PubMed Central journal article supplement (PMC7003460)
Supplement: rspb20192537supp1.pdf [file rspb20192537supp1.pdf]

# **In the corner of the eye: camouflaging motion in the peripheral visual field**

Proceedings of the Royal Society of London B: Biological Sciences

10.1098/rspb.2019.2537

Authors:

Ioan E. Smart<sup>1</sup>,

Innes C. Cuthill<sup>1</sup>,

Nicholas E. Scott-Samuel<sup>2</sup>,

<sup>1</sup> School of Biological Sciences, University of Bristol, Bristol, BS8 1TQ, UK

<sup>2</sup> School of Psychological Science, University of Bristol, Bristol, BS8 1TU, UK

## Smart et al. Supplementary Material

Table S1. Location error: model simplification steps, starting with a full model (five fixed effects and all possible interactions).

| Step | Term removed                        | $\chi^2$ | df | p      |
|------|-------------------------------------|----------|----|--------|
| 1    | Flash:Pattern:Screen:Duration:Speed | 13.77    | 16 | 0.6161 |
| 2    | Flash:Screen:Duration:Speed         | 3.36     | 8  | 0.9095 |
| 3    | Flash:Pattern:Duration:Speed        | 11.05    | 16 | 0.8062 |
| 4    | Flash:Pattern:Screen:Speed          | 4.59     | 8  | 0.8002 |
| 5    | Flash:Pattern:Speed                 | 1.68     | 8  | 0.9894 |
| 6    | Flash:Pattern:Screen:Duration       | 7.66     | 8  | 0.4672 |
| 7    | Flash:Screen:Duration               | 0.12     | 4  | 0.9983 |
| 8    | Flash:Pattern:Screen                | 1.22     | 4  | 0.8749 |
| 9    | Flash:Pattern:Duration              | 5.61     | 8  | 0.6913 |
| 10   | Flash:Duration:Speed                | 9.62     | 8  | 0.2931 |
| 11   | Flash:Duration                      | 1.24     | 4  | 0.8723 |
| 12   | Flash:Pattern                       | 5.40     | 4  | 0.2484 |
| 13   | Flash:Screen:Speed                  | 6.30     | 4  | 0.1780 |
| 14   | Flash:Screen                        | 0.28     | 2  | 0.8697 |
| 15   | Flash:Speed                         | 2.63     | 4  | 0.6222 |
| 16   | Pattern:Screen:Duration:Speed       | 11.53    | 8  | 0.1737 |
| 17   | Pattern:Screen:Duration             | 0.89     | 4  | 0.9259 |
| 18   | Pattern:Duration:Speed              | 5.16     | 8  | 0.7401 |
| 19   | Screen:Duration:Speed               | 4.24     | 4  | 0.3746 |
| 20   | Screen:Duration                     | 1.33     | 2  | 0.5134 |
| 21   | Pattern:Screen:Speed                | 8.85     | 4  | 0.0650 |
| 22   | Screen:Speed                        | 0.33     | 2  | 0.8489 |
| 23   | Pattern:Screen                      | 1.11     | 2  | 0.5741 |
| 24   | Pattern:Speed                       | 7.45     | 4  | 0.1139 |

The initial (saturated) model was ~ Flash\*Pattern\*Screen\*Duration\*Speed + (1 | Subject). Significance was assessed using likelihood ratio tests.

## Analysis of response time

The final model contained a significant two-way interaction between duration and speed ( $\chi^2 = 29.88$ ,  $df = 4$ ,  $p < 0.0001$ ), and a three-way interaction between duration, pattern and the flash prior to the target moving ( $\chi^2 = 21.74$ ,  $df = 8$ ,  $p = 0.0054$ ) (Fig. S1; Table S2). To explore the nature of these interactions the data were split by duration, and models fitted with speed, pattern, flash and the two-way interaction between the latter two factors. For 100 ms movements, speed was not significant ( $\chi^2 = 0.67$ ,  $df = 2$ ,  $p = 0.7150$ ), but the pattern x flash interaction was ( $\chi^2 = 26.14$ ,  $df = 4$ ,  $p < 0.0001$ ). Analysing the flash conditions separately, with no flash, pattern was significant ( $\chi^2 = 26.29$ ,  $df = 2$ ,  $p < 0.0001$ ), with the mean luminance pattern having longer response times than black ( $z = 4.70$ ,  $p < 0.0001$ ) and background matching ( $z = 4.32$ ,  $p < 0.0001$ ), with the latter two treatments not differing ( $z = 0.40$ ,  $p = 0.9170$ ). However, when movement was preceded by a flash, there was no significant effect of pattern (50 ms:  $\chi^2 = 2.75$ ,  $df = 2$ ,  $p = 0.2530$ ; 80 ms:  $\chi^2 = 0.16075$ ,  $p = 0.9228$ ).

For 200 ms movements, the pattern x flash interaction was not significant ( $\chi^2 = 3.33$ ,  $df = 4$ ,  $p = 0.5039$ ). So, removing this term and simplifying the model sequentially, neither pattern ( $\chi^2 = 4.79$ ,  $df = 2$ ,  $p = 0.0914$ ) or speed ( $\chi^2 = 5.58$ ,  $df = 2$ ,  $p = 0.0613$ ) were significant, but flash was ( $\chi^2 = 35.03$ ,  $df = 2$ ,  $p < 0.0001$ ), with response times longer for no flash than when a flash preceded movement (no flash vs 50 ms flash:  $z = 4.28$ ,  $p < 0.0001$ ; no flash vs 80 ms flash:  $z = 5.74$ ,  $p < 0.0001$ ; 50 ms vs 80 ms flash:  $z = 1.46$ ,  $p = 0.3080$ ).

For 400 ms movements, the pattern x flash interaction was not significant ( $\chi^2 = 4.10$ ,  $df = 4$ ,  $p = 0.3927$ ). So, removing this term and simplifying the model sequentially, neither pattern ( $\chi^2 = 0.48$ ,  $df = 2$ ,  $p = 0.7865$ ) or flash ( $\chi^2 = 4.95$ ,  $df = 2$ ,  $p = 0.0841$ ) were significant, but speed was ( $\chi^2 = 70.92$ ,  $df = 2$ ,  $p < 0.0001$ ), with response times increasing with target speed (10 vs 20 deg/s:  $z = 3.565$ ,  $p = 0.0011$ ; 10 vs 35:  $z = 8.53$ ,  $p < 0.0001$ ; 20 vs 35:  $z = 4.98$ ,  $p < 0.0001$ ).

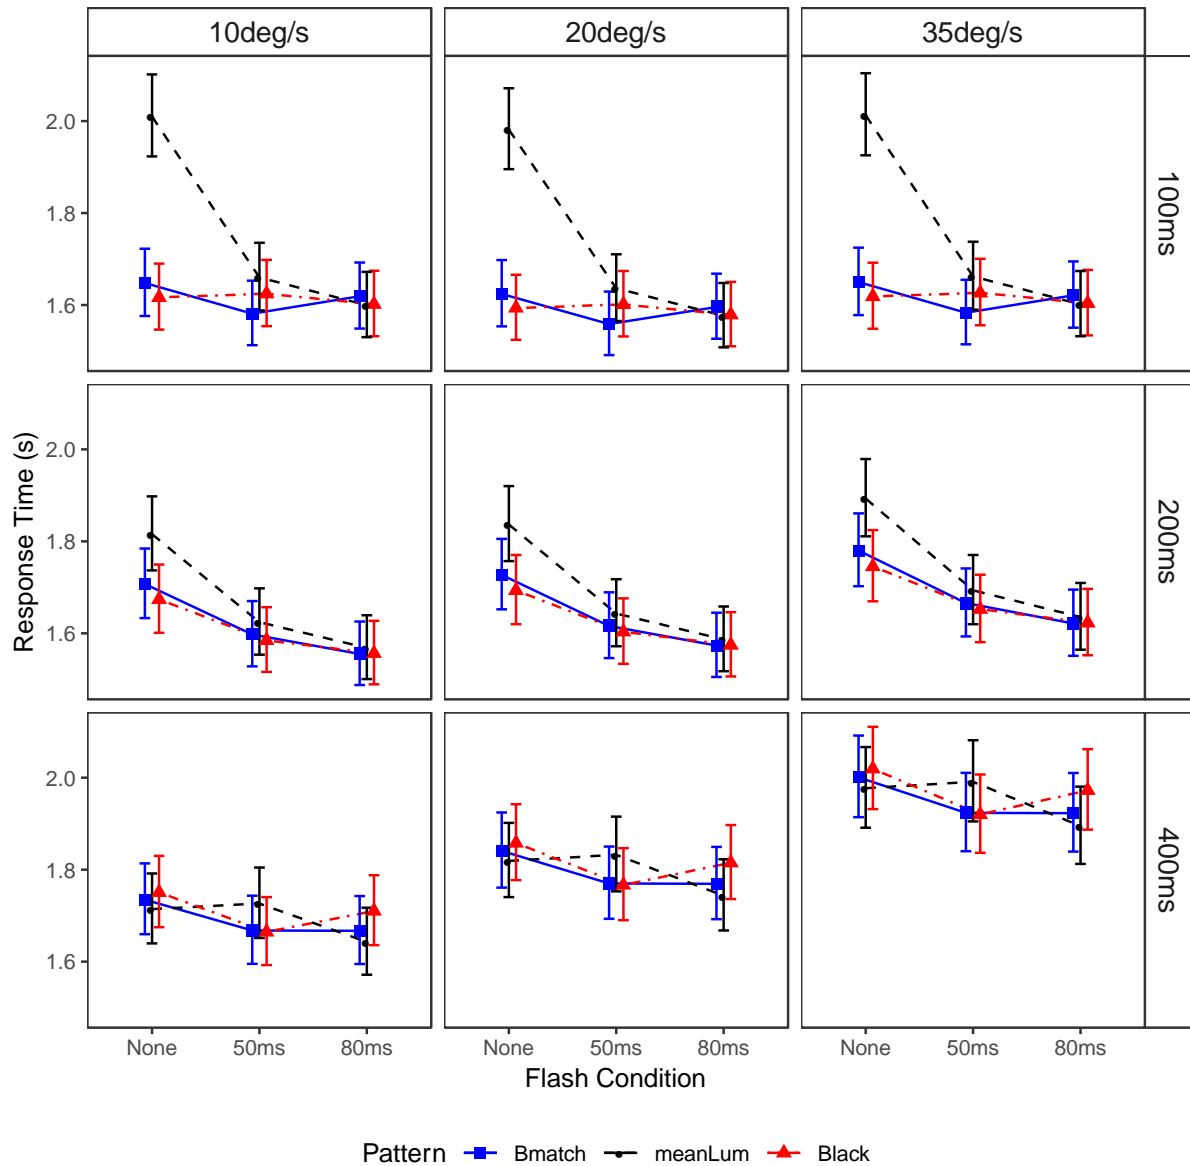

Figure S1 - The response time for participants trying to localise a moving object with different movement and patterning conditions, with 95% confidence intervals based on the fitted model (N=18 participants). Different combinations of movement and patterning conditions can be navigated via the panelling. The phenotype with the strongest effect has mean luminance, does not utilise a flash and has short and/or fast movements.

Table S2. Response time: model simplification steps, starting with a full model (five fixed effects and all possible interactions).

| Step | Term removed                        | $\chi^2$ | df | p      |
|------|-------------------------------------|----------|----|--------|
| 1    | Flash:Pattern:Screen:Duration:Speed | 16.29    | 16 | 0.4333 |
| 2    | Flash:Screen:Duration:Speed         | 2.26     | 8  | 0.9720 |
| 3    | Pattern:Screen:Duration:dotShift    | 5.67     | 8  | 0.6846 |
| 4    | Pattern:Screen:Duration             | 1.22     | 4  | 0.8746 |
| 5    | Flash:Pattern:Duration:dotShift     | 13.46    | 8  | 0.6389 |
| 6    | Pattern:Duration:dotShift           | 4.27     | 8  | 0.8321 |
| 7    | Flash:Screen:Duration:dotShift      | 9.86     | 8  | 0.2749 |
| 8    | Flash:Screen:Duration               | 1.21     | 4  | 0.8756 |
| 9    | Screen:Duration:dotShift            | 3.27     | 8  | 0.5130 |
| 10   | Screen:Duration                     | 0.35     | 2  | 0.8375 |
| 11   | Flash:Duration:dotShif              | 11.36    | 4  | 0.1821 |
| 12   | Flash:Pattern:Screen:dotShift       | 13.94    | 4  | 0.0835 |
| 13   | Flash:Pattern:Screen                | 2.95     | 4  | 0.5655 |
| 14   | Flash:Pattern:dotShift              | 9.11     | 8  | 0.3331 |
| 15   | Pattern:Screen:dotShift             | 5.75     | 4  | 0.2187 |
| 16   | Pattern:Screen                      | 1.32     | 2  | 0.5165 |
| 17   | Pattern:dotShift                    | 7.67     | 4  | 0.1046 |
| 18   | Flash:Screen:dotShift               | 8.04     | 4  | 0.0902 |
| 19   | Flash:Screen                        | 0.21     | 2  | 0.9018 |
| 20   | Screen:dotShift                     | 3.51     | 2  | 0.1725 |
| 21   | Screen                              | 0.03     | 1  | 0.8599 |
| 22   | Flash:dotShift                      | 7.55     | 4  | 0.1096 |

The initial (saturated) model was  $\sim$  Flash\*Pattern\*Screen\*Duration\*Speed + (1 | Subject). Significance was assessed using likelihood ratio tests.

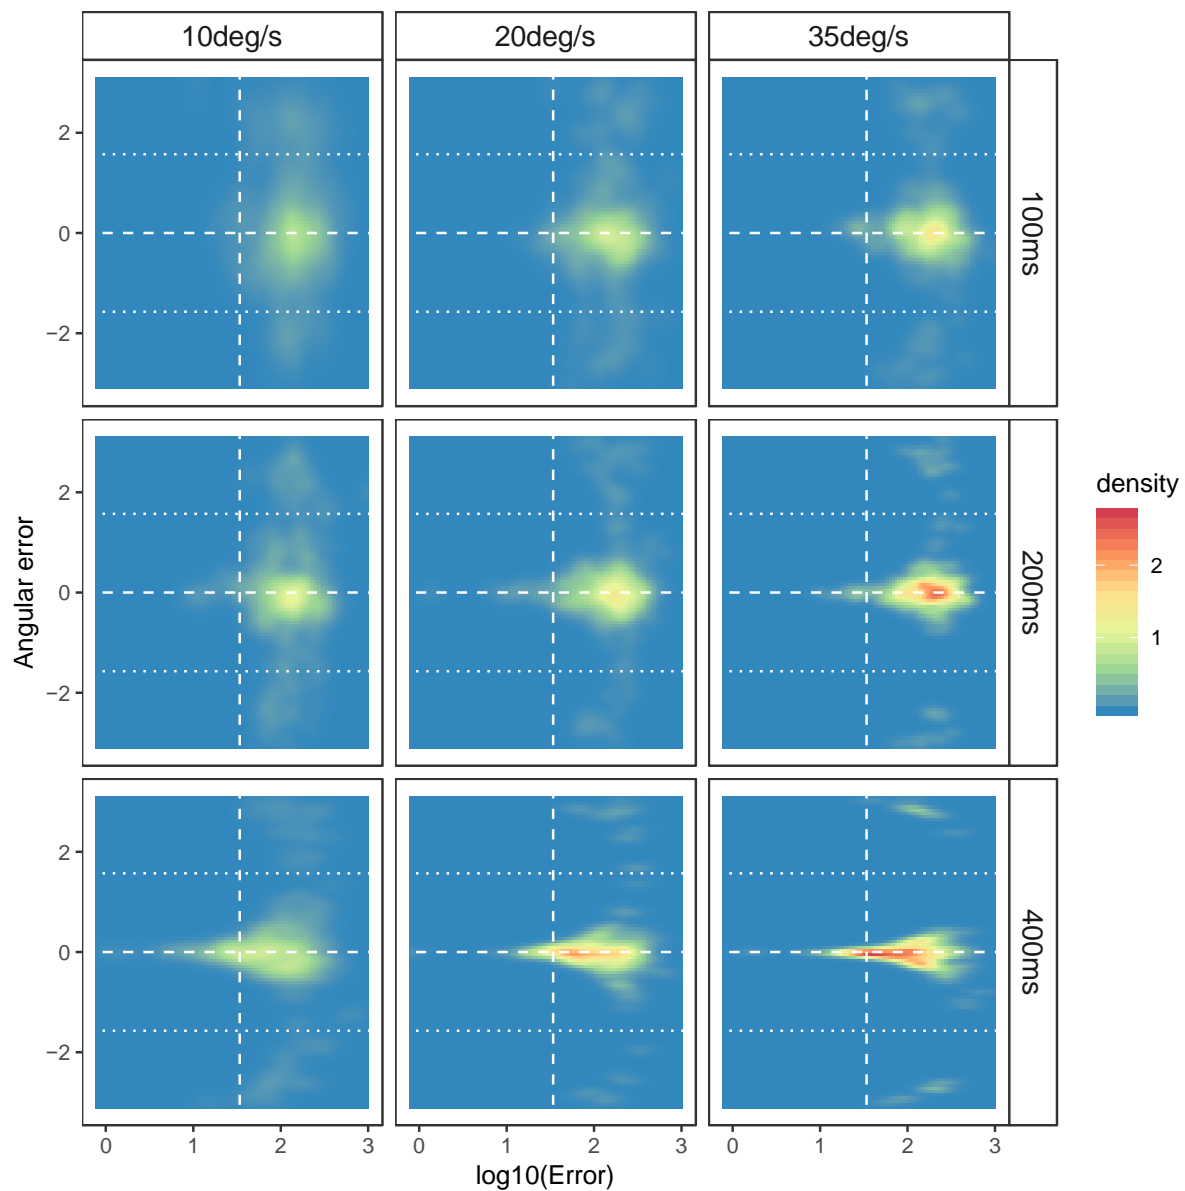

Figure S2 – Angular error (relative to the target’s trajectory) plotted against the log-transformed localisation error (distance from target) in pixels for participants trying to localise a moving object with different movement and patterning conditions (N=18 participants). Different combinations of movement and patterning conditions can be navigated via the panelling.
